# Supplementary material for: National action to combat AMR: a One-Health approach to assess policy priorities in action plans
Source: PubMed Central journal article supplement — BMJ Glob Health. 2020 Jul 13;5(7):e002427. doi: 10.1136/bmjgh-2020-002427 (PMC7359186; doi:10.1136/bmjgh-2020-002427), 2020-07-13
Supplement: bmjgh-2020-002427supp001.pdf [file bmjgh-2020-002427supp001.pdf]

## SUPPLEMENTARY TABLE 1 (A to I)

| <b>Table 1</b> | <b>Categorical Variable</b> | <b>Sub-Variable</b> | <b>Page</b> |
|----------------|-----------------------------|---------------------|-------------|
| <b>A</b>       | Sector                      | Sub-Sector          | 2           |
| <b>B</b>       | Target Group                | -                   | 5           |
| <b>C</b>       | Target Setting              | -                   | 7           |
| <b>D</b>       | Challenge of AMR            | -                   | 8           |
| <b>E</b>       | Challenge of AMR            | Sub-Challenge       | 9           |
| <b>F</b>       | Policy Process              | -                   | 14          |
| <b>G</b>       | Policy Instrument           | -                   | 15          |
| <b>H</b>       | Policy Instrument           | Sub-Instrument      | 16          |
| <b>I</b>       | Building Blocks             | -                   | 20          |

**Supplementary Table 1A** List of values and their corresponding identification number code for 'sector' and 'sub-sector'.

| Value                                         |                                                                                            |                                                                                                                                                                                              |                                                                           |
|-----------------------------------------------|--------------------------------------------------------------------------------------------|----------------------------------------------------------------------------------------------------------------------------------------------------------------------------------------------|---------------------------------------------------------------------------|
| Categorical Variable:<br>Sectors <sup>1</sup> | Sub-variable:<br>Sub-Sectors                                                               | Definition:                                                                                                                                                                                  | Code:                                                                     |
| <b>Other</b>                                  | <b>Unspecified Sector</b>                                                                  | The policy statement does not explicitly state any sector.                                                                                                                                   | 0000                                                                      |
|                                               | <b>Other</b>                                                                               | Listed values sectors are not appropriate. Suggestion for a new value.                                                                                                                       | 9999                                                                      |
| <b>Human <sup>2</sup></b>                     | <b>Unspecified</b>                                                                         | Humans in general. There are no specific sub-populations or sub-groups mentioned or targeted.                                                                                                | 0100                                                                      |
|                                               | <b>Community</b>                                                                           | Population in the community. Usually referred to when talking about the general population or children.                                                                                      | 0101                                                                      |
|                                               | <b>Healthcare Delivery</b>                                                                 | Policy specifically targets the healthcare sector.                                                                                                                                           | 0102                                                                      |
|                                               | <b>Healthcare Industry</b>                                                                 | Policy specifically targets the pharmaceutical industry, such as for research and development.                                                                                               | 0103                                                                      |
|                                               | <b>Other</b>                                                                               | Listed values of sub-sectors under 'Human' sector is not appropriate. Suggestion for a new value.                                                                                            | 0199                                                                      |
|                                               | <b>Animal <sup>3</sup></b>                                                                 | <b>Unspecified</b>                                                                                                                                                                           | Animals in general. There are no specific groups mentioned or focused on. |
| <b>Agriculture</b>                            |                                                                                            | Encompasses all kinds of agriculture, both livestock and aquaculture in general.                                                                                                             | 0201                                                                      |
| <b>Agriculture/Livestock</b>                  |                                                                                            | Livestock in general, no specific animal groups are specified.                                                                                                                               | 0202                                                                      |
| <b>Agriculture/Livestock/Poultry</b>          |                                                                                            | Any domesticated birds kept by humans such as chicken, ducks, turkeys, quails etc.                                                                                                           | 0203                                                                      |
| <b>Agriculture/Livestock/Cattle</b>           |                                                                                            | Any domesticated kept by humans such as cattle, bison, buffalo, yak etc.                                                                                                                     | 0204                                                                      |
| <b>Agriculture/Livestock/Sheep</b>            |                                                                                            | Domesticated sheep                                                                                                                                                                           | 0205                                                                      |
| <b>Agriculture/Livestock/Swine</b>            |                                                                                            | Domesticated pigs                                                                                                                                                                            | 0206                                                                      |
| <b>Agriculture/Livestock/Goat</b>             |                                                                                            | Domesticated goats                                                                                                                                                                           | 0207                                                                      |
| <b>Agriculture/Livestock/Horse</b>            |                                                                                            | Domesticated horses                                                                                                                                                                          | 0208                                                                      |
| <b>Agriculture/Livestock/Deer</b>             |                                                                                            | Domesticated deer                                                                                                                                                                            | 0209                                                                      |
| <b>Agriculture/Livestock/Insects</b>          |                                                                                            | Any domesticated insects kept by humans. This could include those used to produce food or honeybees to produce honey.                                                                        | 0210                                                                      |
| <b>Agriculture/Livestock/Others</b>           |                                                                                            | Any other animal groups which do not fall into the above categories.                                                                                                                         | 0211                                                                      |
| <b>Agriculture/Aquaculture</b>                |                                                                                            | Aquaculture is the farming of aquatic organisms that are animals.                                                                                                                            | 0212                                                                      |
| <b>Agriculture/Aquaculture/Fish</b>           |                                                                                            | Any farmed fish such as salmon, catfish or carp. Excludes crustaceans (e.g. shrimps), molluscs (e.g. oysters, shellfish). If the fish is caught in the wild, refer to the wildlife category. | 0213                                                                      |
| <b>Agriculture/Aquaculture/Crustaceans</b>    |                                                                                            | Any farmed crustaceans such as crabs, lobsters, crayfish, shrimp or krill.                                                                                                                   | 0214                                                                      |
| <b>Agriculture/Aquaculture/Molluscs</b>       | Any farmed molluscs such as slugs, snails, oysters, clams, squid, octopuses or cuttlefish. | 0215                                                                                                                                                                                         |                                                                           |

|                                 |                                          |                                                                                                         |      |
|---------------------------------|------------------------------------------|---------------------------------------------------------------------------------------------------------|------|
|                                 | <b>Agriculture/Aquaculture/Others</b>    | Any other aquatic groups not mentioned in the above categories.                                         | 0216 |
|                                 | <b>Companion</b>                         | Any domesticated or tamed animal that are kept for companionship or pleasure.                           | 0217 |
|                                 | <b>Companion/Feline</b>                  | Specifically focusing on cats.                                                                          | 0218 |
|                                 | <b>Companion/Canine</b>                  | Specifically focusing on dogs.                                                                          | 0219 |
|                                 | <b>Companion/Fish</b>                    | Specifically focusing on fish kept as pets.                                                             | 0220 |
|                                 | <b>Companion/Small Animals</b>           | Specifically focusing on small animals such as rabbits, hamsters, mice.                                 | 0221 |
|                                 | <b>Companion/Reptile</b>                 | Specifically focusing on reptilian pets.                                                                | 0222 |
|                                 | <b>Companion/Others</b>                  | Other pet groups that do not fit into the above categories.                                             | 0223 |
|                                 | <b>Wildlife</b>                          | Undomesticated species found in the environment, usually living independently of humans.                | 0224 |
|                                 | <b>Wildlife/Mammal</b>                   | Specifically focusing on wild mammals.                                                                  | 0225 |
|                                 | <b>Wildlife/Birds</b>                    | Specifically focusing on wild birds. This may include sparrows or pigeons which live in the urban area. | 0226 |
|                                 | <b>Wildlife/Fish</b>                     | Specifically focusing on wild fish. This could also include fish caught in the wild.                    | 0227 |
|                                 | <b>Wildlife/Reptiles</b>                 | Specifically focusing on wild reptiles.                                                                 | 0228 |
|                                 | <b>Wildlife/Insects</b>                  | Specifically focusing on insects. This could also include flies living in farms, homes or abattoirs.    | 0229 |
|                                 | <b>Wildlife/Others</b>                   | Other wildlife animal groups that do not fit into the above categories.                                 | 0230 |
|                                 | <b>Other</b>                             | Listed values of sub-sectors under 'Animal' sector is not appropriate. Suggestion for a new value.      | 0299 |
| <b>Environment</b> <sup>4</sup> | <b>Unspecified</b>                       | Environment in general.                                                                                 | 0300 |
|                                 | <b>Air (Natural)</b>                     | Particles in the air in environment with no urbanization (human activity).                              | 0301 |
|                                 | <b>Air (Urban/Industrial)</b>            | Particles in the air in environment with urbanization or industrial activity, including farming.        | 0302 |
|                                 | <b>Water (Natural)</b>                   | Water in environment with no urbanization (human activity).                                             | 0303 |
|                                 | <b>Water (Urban/Industrial)</b>          | Water in environment with urbanization or industrial activity, including farming.                       | 0304 |
|                                 | <b>Soil (Natural)</b>                    | Soil in environment with no urbanization (human activity).                                              | 0305 |
|                                 | <b>Soil (Urban/Industrial)</b>           | Soil in environment with urbanization or industrial activity, including farming.                        | 0306 |
|                                 | <b>Solid Waste (Urban/Industrial)</b>    | Solid waste from human (including companion animal) or agricultural (livestock and aquaculture).        | 0307 |
|                                 | <b>Waste Products (Urban/Industrial)</b> | Waste products from production of food, medicine or research.                                           | 0308 |
|                                 | <b>Other</b>                             | Listed values of sub-sectors under 'Environment' sector is not appropriate. Suggestion for a new value. | 0399 |
| <b>Plant</b> <sup>4</sup>       | <b>Unspecified</b>                       | There is no specified areas of plant (i.e. whether for food or non-food) mentioned.                     | 0400 |
|                                 | <b>Food Crop</b>                         | Plant crops specifically grown for food - either for humans or animals.                                 | 0401 |

|                            |                                |                                                                                                                                 |                                                                                                  |
|----------------------------|--------------------------------|---------------------------------------------------------------------------------------------------------------------------------|--------------------------------------------------------------------------------------------------|
|                            | <b>Food Crop/Land</b>          | Land plant crops specifically grown for food - either for humans or animals.                                                    | 0402                                                                                             |
|                            | <b>Food Crop/Aquatic</b>       | Aquatic plant crops specifically grown for food. This could include plants like lotuses, seaweed etc.                           | 0403                                                                                             |
|                            | <b>Non Food Crop</b>           | Plant crops in general grown for purposes other than food. This could include grains for biofuel or flowers for commercial use. | 0404                                                                                             |
|                            | <b>Non Food Crop/Flowers</b>   | Flower plant crops grown for purposes other than food.                                                                          | 0405                                                                                             |
|                            | <b>Other</b>                   | Listed values of sub-sectors under 'Plant' sector is not appropriate. Suggestion for a new value.                               | 0499                                                                                             |
| <b>Food</b> <sup>5 6</sup> | <b>Unspecified</b>             | Food in general. No specific food groups is targeted.                                                                           | 0500                                                                                             |
|                            | <b>Domestic</b>                | Domestic, locally-grown food.                                                                                                   | 0501                                                                                             |
|                            | <b>Domestic/Meat Products</b>  | Domestic, locally-grown meat products. Includes eggs.                                                                           | 0502                                                                                             |
|                            | <b>Domestic/Plant</b>          | Domestic, locally-grown or harvested plant products.                                                                            | 0503                                                                                             |
|                            | <b>Domestic/Seafood</b>        | Domestic, locally-grown, caught or harvested seafood.                                                                           | 0504                                                                                             |
|                            | <b>Domestic/Dairy Products</b> | Domestic, locally produced dairy products. Includes items such as milk, cheese, yogurt.                                         | 0505                                                                                             |
|                            | <b>Imported</b>                | Imported, internationally-produced food products.                                                                               | 0506                                                                                             |
|                            | <b>Imported/Meat Products</b>  | Imported, internationally-grown meat products. Includes eggs.                                                                   | 0507                                                                                             |
|                            | <b>Imported/Plant</b>          | Imported, internationally-grown or harvested plant products.                                                                    | 0508                                                                                             |
|                            | <b>Imported/Seafood</b>        | Imported, internationally-grown, caught or harvested seafood.                                                                   | 0509                                                                                             |
|                            | <b>Imported/Dairy Products</b> | Imported, internationally-produced dairy products. Includes items such as milk, cheese or yogurt.                               | 0510                                                                                             |
|                            |                                | <b>Other</b>                                                                                                                    | Listed values of sub-sectors under 'Food' sector is not appropriate. Suggestion for a new value. |
| <b>One-Health</b>          | <b>Unspecified Sectors</b>     | Sectors which would be included in the 'One-Health' policy are not stated.                                                      | 0600                                                                                             |
|                            | <b>Specified Sectors</b>       | Sectors which would be included in the 'One Health' policy are clearly stated.                                                  | 0601                                                                                             |

**Supplementary Table 1B** List of values and their corresponding identification number code for 'target group'.**Category Variable: Target Group**

| <b>Value:</b>                 | <b>Definition:</b>                                                                                                                                                                                                                                            | <b>Code:</b> |
|-------------------------------|---------------------------------------------------------------------------------------------------------------------------------------------------------------------------------------------------------------------------------------------------------------|--------------|
| <b>Unspecified Group</b>      | There is no specific group targeted by the policy statement.                                                                                                                                                                                                  | 00           |
| <b>Academics</b>              | Targeting to those at college, academy, school, or other educational institution, especially one for higher education.                                                                                                                                        | 01           |
| <b>Children</b>               | Population who are usually below the age of 21. Age limit may differ from country-to-country.                                                                                                                                                                 | 02           |
| <b>Consumers</b>              | Targeting those who purchase certain things. For example, food.                                                                                                                                                                                               | 03           |
| <b>Dispenser</b>              | Those who prepare, package, label, record keep and transfer prescription drugs to patient or an intermediary, who is responsible for the administration of drug. In different countries, dispensers may not necessarily be trained and certified pharmacists. | 04           |
| <b>Dispenser / Pharmacist</b> | Those who prepare, package, label, record keep and transfer prescription drugs to patient or an intermediary, who is responsible for the administration of drug. It is specifically mentioned that the dispenser is a pharmacist.                             | 05           |
| <b>Elderly</b>                | Population over the age of 65 years.                                                                                                                                                                                                                          | 06           |
| <b>Ethnic Groups</b>          | Community or population made up of people who share a common cultural background or descent.                                                                                                                                                                  | 07           |
| <b>Farmer</b>                 | A person engaged in agriculture, raising living organisms for food or raw materials. Encompasses both animal and plant agriculture.                                                                                                                           | 08           |
| <b>Feed Producer</b>          | Those involved in the process of producing animal feed, formulated to meet specific animal nutrition requirements.                                                                                                                                            | 09           |
| <b>General Population</b>     | Individuals without reference to any specific characteristics. Often referred to as "community".                                                                                                                                                              | 10           |
| <b>Government</b>             | Group of people with the authority to govern a country or state.                                                                                                                                                                                              | 11           |
| <b>Healthcare worker</b>      | Those whose job it is to protect and improve the health of their communities. A broad term that can include doctors, nurses, laboratory personnel etc.                                                                                                        | 12           |
| <b>Industry</b>               | Companies and activities involved in the process of producing goods for sale. Use as a general term.                                                                                                                                                          | 13           |
| <b>Migrants / Refugees</b>    | People who have moved from another place.                                                                                                                                                                                                                     | 14           |
| <b>Nurses</b>                 | Person trained to care for the sick, especially in a hospital.                                                                                                                                                                                                | 15           |
| <b>Parents</b>                | Those who have young children.                                                                                                                                                                                                                                | 16           |
| <b>Patient</b>                | Any recipient of health care service - both for inpatient and outpatient.                                                                                                                                                                                     | 17           |
| <b>Pet Owners</b>             | Those who own animals that are raised not for consumption (i.e. companion animals).                                                                                                                                                                           | 18           |
| <b>Prescribers / Dentist</b>  | A person who is qualified to treat diseases and other conditions that affect the teeth and gums.                                                                                                                                                              | 19           |

**Supplementary Table 1B** List of values and their corresponding identification number code for 'target group'.**Category Variable: Target Group**

| <b>Value:</b>                            | <b>Definition:</b>                                                                                                                                                                                                                                                                                                                                                                                    | <b>Code:</b> |
|------------------------------------------|-------------------------------------------------------------------------------------------------------------------------------------------------------------------------------------------------------------------------------------------------------------------------------------------------------------------------------------------------------------------------------------------------------|--------------|
| <b>Prescribers / Medical Doctor</b>      | A person who is qualified to diagnose and treat people who are ill.                                                                                                                                                                                                                                                                                                                                   | 20           |
| <b>Prescribers / Other</b>               | A person who prescribes medication. In some countries, healthcare workers who are not dentists or doctors have the ability to prescribe medication. Select this value if the policy does not mention specifically if the targeted group are dentists or doctors.                                                                                                                                      | 21           |
| <b>Processors (Food)</b>                 | Those who work on a production line to produce food. Includes both food processing workers and those working in kitchens.                                                                                                                                                                                                                                                                             | 22           |
| <b>Retailers</b>                         | A business or company that sells to the consumer directly.                                                                                                                                                                                                                                                                                                                                            | 23           |
| <b>Slaughterhouse Workers</b>            | Those who manage animals before and during the slaughtering process.                                                                                                                                                                                                                                                                                                                                  | 24           |
| <b>Traditional Medicine Practitioner</b> | Those that practice traditional medicine. Definition of traditional medicine is "the sum total of the knowledge, skills, and practices based on the theories, beliefs, and experiences indigenous to different cultures, whether explicable or not, used in the maintenance of health as well as in the prevention, diagnosis, improvement or treatment of physical and mental illness." <sup>7</sup> | 25           |
| <b>Veterinarian</b>                      | A person qualified to treat diseased or injured animals                                                                                                                                                                                                                                                                                                                                               | 26           |
| <b>Other</b>                             | Listed values is not appropriate. Suggestion for a new value.                                                                                                                                                                                                                                                                                                                                         | 99           |

**Supplementary Table 1C** List of values and their corresponding identification number code for 'target setting'.**Category Variable:** Target Setting

| <b>Value</b>                               | <b>Definition:</b>                                                                                                                                                                                                                                                                                                                                | <b>Code:</b> |
|--------------------------------------------|---------------------------------------------------------------------------------------------------------------------------------------------------------------------------------------------------------------------------------------------------------------------------------------------------------------------------------------------------|--------------|
| <b>Unspecified Setting</b>                 | There is no specific setting mentioned                                                                                                                                                                                                                                                                                                            | 00           |
| <b>Army/Military Healthcare facilities</b> | In many countries, military health care services operate separately to public healthcare.                                                                                                                                                                                                                                                         | 01           |
| <b>Child-Care Centres</b>                  | Care centres which look after children.                                                                                                                                                                                                                                                                                                           | 02           |
| <b>Clinics (outpatient only)</b>           | Medical facilities smaller than a hospital which generally provide only outpatient services. Other names include ambulatory care.                                                                                                                                                                                                                 | 03           |
| <b>Community Pharmacy</b>                  | Shop within the community in which medicines are prepared and sold.                                                                                                                                                                                                                                                                               | 04           |
| <b>Emergency Department</b>                | Medical treatment facility specializing in emergency medicine, also known as an accident & emergency department or casualty department.                                                                                                                                                                                                           | 05           |
| <b>Farms</b>                               | An area of land, together with the buildings on it, that is used for growing crops or raising animals.                                                                                                                                                                                                                                            | 06           |
| <b>Grocery Store (Food Market)</b>         | Self-service retail market selling foods and household merchandise.                                                                                                                                                                                                                                                                               | 07           |
| <b>Hospital or Clinic Pharmacy</b>         | Part of the hospital where medicines are prepared.                                                                                                                                                                                                                                                                                                | 08           |
| <b>Hospitals (Inpatient)</b>               | Health care institutions which can provide inpatient care.                                                                                                                                                                                                                                                                                        | 09           |
| <b>Laboratories</b>                        | Place for testing and analysis                                                                                                                                                                                                                                                                                                                    | 10           |
| <b>Nursing Home (or Long-Term Care)</b>    | Facility that provides rehabilitative, restorative, and/or ongoing skilled nursing care to patients or residents.                                                                                                                                                                                                                                 | 11           |
| <b>Open Landfill</b>                       | Site for the disposal of waste and materials by burial.                                                                                                                                                                                                                                                                                           | 12           |
| <b>Pharmaceutical Companies</b>            | A commercial business licensed to research, develop, market and/or distribute drugs.                                                                                                                                                                                                                                                              | 13           |
| <b>Prison</b>                              | Place where criminals are kept as punishment or where people accused of a crime are kept before their trial.                                                                                                                                                                                                                                      | 14           |
| <b>Restaurants</b>                         | Place where people pay to sit and eat meals prepared by others.                                                                                                                                                                                                                                                                                   | 15           |
| <b>Schools (incl. higher edu)</b>          | Place to learn. Encompasses all levels of education except continual professional development.                                                                                                                                                                                                                                                    | 16           |
| <b>Sewage Plants</b>                       | Place where sewage is cleaned so that it is not harmful or dangerous to the environment                                                                                                                                                                                                                                                           | 17           |
| <b>Slaughterhouse</b>                      | Place where animals are slaughtered for food. Other names include abattoir.                                                                                                                                                                                                                                                                       | 18           |
| <b>Surface Water</b>                       | Water that collects on the surface of the ground.                                                                                                                                                                                                                                                                                                 | 19           |
| <b>Traditional Medicine Clinic</b>         | Clinics which specialize in "the sum total of the knowledge, skills, and practices based on the theories, beliefs, and experiences indigenous to different cultures, whether explicable or not, used in the maintenance of health as well as in the prevention, diagnosis, improvement or treatment of physical and mental illness." <sup>7</sup> | 20           |
| <b>Zoo</b>                                 | A facility in which all animals are housed within enclosures, displayed to the public.                                                                                                                                                                                                                                                            | 21           |

|              |                                                               |    |
|--------------|---------------------------------------------------------------|----|
| <b>Other</b> | Listed values is not appropriate. Suggestion for a new value. | 99 |
|--------------|---------------------------------------------------------------|----|

**Supplementary Table 1D** List of values and their corresponding identification number code for 'challenge' of AMR.

**Categorical Variable:** Challenge of Policy <sup>8</sup>

| <b>Value:</b>               | <b>Definition:</b>                                                                                                            |
|-----------------------------|-------------------------------------------------------------------------------------------------------------------------------|
| <b>Other</b>                | The goal of the policy statement does not fit into the following six categories.                                              |
| <b>Access</b>               | Policies aimed at improving access to quality antimicrobials.                                                                 |
| <b>Conservation</b>         | Policies aimed at improving use of existing or new antibiotics whether by reducing use and/or misuse.                         |
| <b>Containment</b>          | Policies that aim at limiting the spread of resistance infections                                                             |
| <b>Infection Prevention</b> | Policies that aim at preventing infectious disease in the first place.                                                        |
| <b>Innovation</b>           | Policies that aim at focusing on fostering research and development of new antibiotics, other compounds as well as diagnosis. |
| <b>Surveillance</b>         | Increase the information that we have about the system                                                                        |



**Supplementary Table 1E** List of values and their corresponding identification number code for 'challenge' and 'sub-challenge' of AMR.

| Value                 |                                               |                                                                                                                                                                                                                                           |       |
|-----------------------|-----------------------------------------------|-------------------------------------------------------------------------------------------------------------------------------------------------------------------------------------------------------------------------------------------|-------|
| Categorical Variable: | Sub-Variable: Sub-Challenge                   | Definition:                                                                                                                                                                                                                               | Code: |
| <b>Other</b>          | <b>Unspecified Goal</b>                       | The policy has no goals or aims.                                                                                                                                                                                                          | 0000  |
|                       | <b>Other</b>                                  | Listed values of challenges are not appropriate. Suggestion for a new value.                                                                                                                                                              | 9999  |
| <b>Access</b>         | <b>Unspecified</b>                            | General statement on improving access to antibiotics. No specific methods of improving access are mentioned.                                                                                                                              | 0100  |
|                       | <b>Compulsory licensing of antimicrobials</b> | Licensing of antimicrobials may help reduce the price, and increase utilization without altering patient out-of-pocket spending, health plan costs, or pharmaceutical profits, increasing access to antimicrobials.                       | 0101  |
|                       | <b>Essential list of medicine</b>             | A country may have their own individualized 'Essential Medicine List' based off of the WHO's list to expand access to medicine. The antimicrobials within the list should be medications to which people should have access at all times. | 0102  |
|                       | <b>Subsidies/Disbursement</b>                 | To reduce the price of the antimicrobial to increase access to populations from low socio-economic status.                                                                                                                                | 0103  |
|                       | <b>Other</b>                                  | Listed values of sub-challenges under 'Access' are not appropriate. Suggestion for a new value.                                                                                                                                           | 0199  |
| <b>Conservation</b>   | <b>Unspecified</b>                            | General statement on conserving antibiotics. No specific method of conservation is mentioned within the text.                                                                                                                             | 0200  |
|                       | <b>Distribution</b>                           | Sale of antimicrobials in general. This may include retailers purchase from wholesalers.                                                                                                                                                  | 0201  |
|                       | <b>Distribution / Internet Sales</b>          | Sale of antimicrobials on the internet.                                                                                                                                                                                                   | 0202  |
|                       | <b>Distribution / Prescription-only use</b>   | Prescription of antimicrobials by licensed professionals is required before access to antimicrobials are granted to the patient.                                                                                                          | 0203  |
|                       | <b>Drug Promotion</b>                         | Limit how pharmaceutical companies can promote the use of antimicrobials.                                                                                                                                                                 | 0204  |
|                       | <b>Quality Antimicrobial Production</b>       | Limit the production of counterfeit and/or low-efficacy antimicrobials. Treatment with low quality antimicrobials does not allow for the complete elimination of bacteria, thus promoting resistance.                                     | 0205  |

**Supplementary Table 1E** List of values and their corresponding identification number code for 'challenge' and 'sub-challenge' of AMR.

| <b>Value</b>                                    |                                                  |                                                                                                                                                                                                                                              |                                                                                          |
|-------------------------------------------------|--------------------------------------------------|----------------------------------------------------------------------------------------------------------------------------------------------------------------------------------------------------------------------------------------------|------------------------------------------------------------------------------------------|
| <b>Categorical Variable:</b>                    | <b>Sub-Variable:</b>                             | <b>Definition:</b>                                                                                                                                                                                                                           | <b>Code:</b>                                                                             |
| <b>Challenge</b>                                | <b>Use / Awareness Campaign</b>                  | Improve understanding of AMR in non-prescribers, including farmers, usually the general population.                                                                                                                                          | 0206                                                                                     |
|                                                 | <b>Use / Critically important antibiotics</b>    | Distinguish the importance of certain antimicrobials, only to be used in situations where other, non-critically important antimicrobials do not work. Includes the creation of important antibiotics in either human or veterinary medicine. | 0207                                                                                     |
|                                                 | <b>Use / Non-Therapeutic Use</b>                 | Use of antimicrobials that do not involve the treatment of a sick individual. Includes use of antimicrobials for prophylaxis, metaphylaxis or, growth promotion.                                                                             | 0208                                                                                     |
|                                                 | <b>Use / Stewardship Programme</b>               | Improve prescription of antimicrobials in medical professionals. Interventions aimed at conserving antimicrobials, reducing use or developing better prescribing.                                                                            | 0209                                                                                     |
|                                                 | <b>Other</b>                                     | Listed values of sub-challenges under 'Conservation' are not appropriate. Suggestion for a new value.                                                                                                                                        | 0299                                                                                     |
|                                                 | <b>Containment</b> <sup>9</sup><br><sub>10</sub> | <b>Unspecified</b>                                                                                                                                                                                                                           | Limiting the spread of resistant infection in general. No specific pathway is mentioned. |
| <b>Animal to Animal</b>                         |                                                  | From sick or resistance carrier animals to healthy animals.                                                                                                                                                                                  | 0301                                                                                     |
| <b>Animal to Environment</b>                    |                                                  | From sick or resistance carrier animals to the environment.                                                                                                                                                                                  | 0302                                                                                     |
| <b>Animal to Human (Direct Contact)</b>         |                                                  | From sick or resistance carrier animals to humans by direct contact (i.e. interacting with the animal).                                                                                                                                      | 0303                                                                                     |
| <b>Animal to Human (Food)</b>                   |                                                  | From sick or resistance carrier animals to humans through consuming meat from both livestock and aquaculture.                                                                                                                                | 0304                                                                                     |
| <b>Animal to Human (General)</b>                |                                                  | From sick or resistance carrier animals to humans in a non-specified way (i.e. either by food or by direct contact).                                                                                                                         | 0305                                                                                     |
| <b>Environment to Animal</b>                    |                                                  | Environment, such as natural or urban (e.g. farm sheds), with resistance bacteria to healthy, non-carrier animals.                                                                                                                           | 0306                                                                                     |
| <b>Environment to Human</b>                     |                                                  | Environment, such as natural or urban (e.g. farm sheds), with resistance bacteria to healthy, non-carrier humans.                                                                                                                            | 0307                                                                                     |
| <b>Food (other than meat products) to Human</b> |                                                  | Food other than meat-based, containing resistance bacteria spreading to healthy, non-carrier humans.                                                                                                                                         | 0308                                                                                     |

**Supplementary Table 1E** List of values and their corresponding identification number code for 'challenge' and 'sub-challenge' of AMR.

| <b>Value</b>                 |                                |                                                                                                                                                                     |              |
|------------------------------|--------------------------------|---------------------------------------------------------------------------------------------------------------------------------------------------------------------|--------------|
| <b>Categorical Variable:</b> | <b>Sub-Variable:</b>           | <b>Definition:</b>                                                                                                                                                  | <b>Code:</b> |
| <b>Challenge</b>             | <b>Sub-Challenge</b>           |                                                                                                                                                                     |              |
|                              | <b>Food to Animals</b>         | Feed for animals containing resistance bacteria given to animals.                                                                                                   | 0309         |
|                              | <b>Human to Animal</b>         | From sick, carrier humans to healthy non-carrier animals.                                                                                                           | 0310         |
|                              | <b>Human to Environment</b>    | From sick, carrier humans to environment.                                                                                                                           | 0311         |
|                              | <b>Human to Human</b>          | From sick or resistance carrier humans to healthy humans.                                                                                                           | 0312         |
|                              | <b>Human to Human (Food)</b>   | From sick or carrier humans to healthy, non-carrier via food.                                                                                                       | 0313         |
|                              | <b>Other</b>                   | Listed values of sub-challenges under 'Containment' are not appropriate. Suggestion for a new value.                                                                | 0399         |
| <b>Infection Prevention</b>  | <b>Unspecified</b>             | Infection prevention in general. No specific methods are mentioned or they do not fall into any of the below categories.                                            | 0400         |
|                              | <b>Animal Husbandry</b>        | Controlled cultivation, management, and production of domestic animals, including improvement of the qualities considered desirable by humans by means of breeding. | 0401         |
|                              | <b>Biosecurity</b>             | Procedures or measures designed to protect the population against harmful biological or biochemical substances.                                                     | 0402         |
|                              | <b>Eradication</b>             | Cleansing of an area or environment of potential infection.                                                                                                         | 0403         |
|                              | <b>Hand Hygiene</b>            | Practices aimed at improving hand hygiene.                                                                                                                          | 0404         |
|                              | <b>Immunization</b>            | Interventions or campaigns to improve uptake of vaccinations.                                                                                                       | 0405         |
|                              | <b>Risk Assessment</b>         | Focus on reduction of risk from infection through phases of facility planning, design, construction, renovation, facility maintenance.                              | 0406         |
|                              | <b>Safe Food Handling</b>      | Practices to improve the safe handling of food.                                                                                                                     | 0407         |
|                              | <b>Safe Invasive Procedure</b> | Practices to improve invasive procedures to minimize the rate of infection and the need for antimicrobials.                                                         | 0408         |
|                              | <b>Safe Water</b>              | Clean water.                                                                                                                                                        | 0409         |

**Supplementary Table 1E** List of values and their corresponding identification number code for 'challenge' and 'sub-challenge' of AMR.

| Value                                     |                                       |                                                                                                                                                                              |              |
|-------------------------------------------|---------------------------------------|------------------------------------------------------------------------------------------------------------------------------------------------------------------------------|--------------|
| <b>Categorical Variable:</b><br>Challenge | <b>Sub-Variable:</b> Sub-Challenge    | <b>Definition:</b>                                                                                                                                                           | <b>Code:</b> |
|                                           | <b>Sanitation</b>                     | Interventions related to water, sanitation and general hygiene (WASH).                                                                                                       | 0410         |
|                                           | <b>Screening</b>                      | Check individuals for carriage and/or infection by resistance bacteria.                                                                                                      | 0411         |
|                                           | <b>Other</b>                          | Listed values of sub-challenges under 'Infection prevention' are not appropriate. Suggestion for a new value.                                                                | 0499         |
| <b>Innovation</b>                         | <b>Unspecified</b>                    | Innovation in general. There are no specific areas that is being focused on.                                                                                                 | 0500         |
|                                           | <b>Alternative Treatments</b>         | Treatments other than the traditional medication (i.e. antibiotic therapy).                                                                                                  | 0501         |
|                                           | <b>Biosecurity technologies</b>       | Technologies or equipment aimed at protecting the population against harmful biological or biochemical substances.                                                           | 0502         |
|                                           | <b>Diagnostics</b>                    | New technology or technique to determine cause of illness.                                                                                                                   | 0503         |
|                                           | <b>Infection Prevention</b>           | New technology or interventions to prevent infections besides vaccination.                                                                                                   | 0504         |
|                                           | <b>Novel antibiotics</b>              | New antimicrobials. General term if no specific type is mentioned.                                                                                                           | 0505         |
|                                           | <b>Sanitation</b>                     | New technology or techniques to provide clean drinking water or adequate sewage disposal.                                                                                    | 0506         |
|                                           | <b>Vaccinations</b>                   | New immunization.                                                                                                                                                            | 0507         |
|                                           | <b>Food Yield (animals or plants)</b> | New technology or techniques to improve yield from food animals or crops. For example, researching alternatives to improve protein yield rather than using growth promoters. | 0508         |
|                                           | <b>Other</b>                          | Listed values of sub-challenges under 'Innovation' are not appropriate. Suggestion for a new value.                                                                          | 0599         |
| <b>Surveillance</b>                       | <b>Unspecified</b>                    | Surveillance in general. No specific type of surveillance is mentioned.                                                                                                      | 0600         |
|                                           | <b>Antibiotic Residue</b>             | Monitoring of residue of antimicrobials such as the active ingredient.                                                                                                       | 0601         |
|                                           | <b>Epidemiology</b>                   | Overall monitoring of the incidence and distribution of bacteria in general.                                                                                                 | 0602         |
|                                           | <b>Epidemiology/Resistance</b>        | Monitoring specifically for resistance.                                                                                                                                      | 0603         |

**Supplementary Table 1E** List of values and their corresponding identification number code for 'challenge' and 'sub-challenge' of AMR.

| <b>Value</b>                 |                                      |                                                                                                       |              |
|------------------------------|--------------------------------------|-------------------------------------------------------------------------------------------------------|--------------|
| <b>Categorical Variable:</b> | <b>Sub-Variable:</b>                 | <b>Definition:</b>                                                                                    | <b>Code:</b> |
| Challenge                    | Sub-Challenge                        |                                                                                                       |              |
|                              | <b>Epidemiology/Resistance/Genes</b> | Monitoring of resistance genes.                                                                       | 0604         |
|                              | <b>Stewardship</b>                   | Monitoring of uptake and/or adherence to stewardship programmes and their effects on AMR and/or AMU.  | 0605         |
|                              | <b>Use</b>                           | Monitoring of the overall use of antibiotics. No specific mention of how.                             | 0606         |
|                              | <b>Use/Prescription</b>              | Monitoring specifically for the use of antibiotics using prescription data.                           | 0607         |
|                              | <b>Use/Sales or Import</b>           | Monitoring specifically for the use of antibiotics using the sales data.                              | 0608         |
|                              | <b>Use/Diagnostic Code</b>           | Monitoring antibiotic use combined with diagnostic codes                                              | 0609         |
|                              | <b>Other</b>                         | Listed values of sub-challenges under 'Surveillance' are not appropriate. Suggestion for a new value. | 0699         |

**Supplementary Table 1F** List of values and their corresponding identification number code for 'policy process'.**Categorical Variable:** Policy Process <sup>11</sup>

| <b>Value:</b>                  | <b>Definition:</b>                                                                                                                           | <b>Examples:</b>                                                                                                                                                                                                                                                                                                         | <b>Code:</b> |
|--------------------------------|----------------------------------------------------------------------------------------------------------------------------------------------|--------------------------------------------------------------------------------------------------------------------------------------------------------------------------------------------------------------------------------------------------------------------------------------------------------------------------|--------------|
| <b>Unspecified</b>             | The policy does not state the stage that it is in                                                                                            |                                                                                                                                                                                                                                                                                                                          | 0            |
| <b>Pre-Initiation Analysis</b> | The policy is at the stage of considering whether to enact anything.                                                                         | <ul style="list-style-type: none"> <li>– "Asses whether to..."</li> <li>– "Investigate the creation of..."</li> <li>– "Consider increasing..."</li> <li>– "Explore how to use..."</li> </ul>                                                                                                                             | 1            |
| <b>Initiation</b>              | The policy is attempting to create a new policy, system or action.                                                                           | <ul style="list-style-type: none"> <li>– "Carry out..."</li> <li>– "Establish..."</li> <li>– "Start the process..."</li> <li>– "Develop..."</li> <li>– "Build..."</li> <li>– "Conduct research..."</li> <li>– "Endeavour to ..."</li> <li>– "Implement..."</li> <li>– "Introduce..."</li> <li>– "Initiate..."</li> </ul> | 2            |
| <b>Adaptation</b>              | The policy aims to improve or update existing policy, system or actions.                                                                     | <ul style="list-style-type: none"> <li>– "Strengthen..."</li> <li>– "Improve..."</li> <li>– "Enhance..."</li> <li>– "Work to extend..."</li> </ul>                                                                                                                                                                       | 3            |
| <b>Maintenance</b>             | The policy aims to ensure that existing policy, system or action remains.                                                                    | <ul style="list-style-type: none"> <li>– "Up-to-date..."</li> <li>– "Ensure that..."</li> <li>– "Continue..."</li> </ul>                                                                                                                                                                                                 | 4            |
| <b>Elimination</b>             | The policy aims to remove an existing policy, system or action.                                                                              | <ul style="list-style-type: none"> <li>– "Repeal..."</li> <li>– "Eliminate..."</li> <li>– "Stop..."</li> </ul>                                                                                                                                                                                                           | 5            |
| <b>Evaluation</b>              | The policy aims at reviewing existing policy, system or actions. This may also be a meta-statement on the evaluation of the document itself. | <ul style="list-style-type: none"> <li>– "Evaluate..."</li> <li>– "Review..."</li> </ul>                                                                                                                                                                                                                                 | 6            |
| <b>Other</b>                   | Listed values of policy process are not appropriate. Suggestion for a new value.                                                             |                                                                                                                                                                                                                                                                                                                          | 9            |

**Supplementary Table 1G** List of values and their corresponding identification number code for 'policy instrument'.**Categorical Variable:** Policy Instrument

"set of techniques by which governmental authorities wield their power in attempting to ensure support and effect social change"<sup>12</sup>

**Value:****Definition:****Other**

No policy instrument is indicated in the policy statement.

**Information (Sermons)**

"attempts at influencing people through the transfer of knowledge, the communication of reasoned argument, and persuasion."<sup>12</sup>

**Economic Means (Carrots)**

"[T]he handing out or taking away of material resources while the addresses are not obligated to take the measures involved."<sup>12</sup>

**Regulation (Sticks)**

"Measures taken by governmental units to influence people by means of formulated rules and directives which mandate receivers to act in accordance with what is ordered in these rules and directives."<sup>12</sup>

**Supplementary Table 1H** List of values and their corresponding identification number code for ‘policy instrument’.

| Value                           |                    |                           |                                                                                                                                                                                                                                                                                                 |                                                                                                                             |
|---------------------------------|--------------------|---------------------------|-------------------------------------------------------------------------------------------------------------------------------------------------------------------------------------------------------------------------------------------------------------------------------------------------|-----------------------------------------------------------------------------------------------------------------------------|
| Categorical Variable:           | Variant:           | Sub-Variable:             | Definition:                                                                                                                                                                                                                                                                                     | Code:                                                                                                                       |
| Policy Instrument <sup>12</sup> |                    | Sub-Instrument            |                                                                                                                                                                                                                                                                                                 |                                                                                                                             |
| <b>Other</b>                    | <b>Unspecified</b> | <b>Unspecified</b>        | The policy has no instruments.                                                                                                                                                                                                                                                                  | 000                                                                                                                         |
|                                 |                    | <b>Other</b>              | Policy instruments not covered by ‘information’, ‘economic means’ or ‘regulations’. This value will act as a flagging system to identify potential values to be added into the instruments once discussed with a panel.                                                                         | 999                                                                                                                         |
| <b>Information (Sermons)</b>    | <b>Unspecified</b> | <b>Unspecified</b>        | Policy states that does not specifically indicate which type (awareness, nudging or training/education). It also does not state whether it is to encourage addresses to do something or to warn them against doing something. addresses must be influenced through some means of communication. | 010                                                                                                                         |
|                                 |                    | <b>Awareness</b>          | “Efforts to communicate to large numbers of citizens in order to achieve a policy result”. <sup>13</sup> These can include awareness campaigns through posters or mass media or, labelling of products.                                                                                         | 011                                                                                                                         |
|                                 |                    | <b>Nudging</b>            | “any aspect of the choice architecture that alters people’s behaviour in a predictable way without forbidding any options or significantly changing their economic incentives. ... the intervention must be easy and cheap to avoid [but] not mandat[ory].” <sup>14</sup>                       | 012                                                                                                                         |
|                                 |                    | <b>Education/Training</b> | Transferring knowledge through education (for students) and training (for professionals).                                                                                                                                                                                                       | 013                                                                                                                         |
|                                 |                    | <b>Other</b>              | Listed values of sub-instruments under ‘Information’ are not appropriate. Suggestion for a new value.                                                                                                                                                                                           | 019                                                                                                                         |
|                                 |                    | <b>Positive</b>           | <b>Unspecified</b>                                                                                                                                                                                                                                                                              | Policy statement emphasize stimulation of the right conduct through communication but fails to explain through which means. |
|                                 |                    | <b>Awareness</b>          | Stimulation of the right conduct through mass communication.                                                                                                                                                                                                                                    | 111                                                                                                                         |



**Supplementary Table 1H** List of values and their corresponding identification number code for 'policy instrument'.

| Value                           |                                 |                           |                                                                                                                            |                                                                                                                                     |     |
|---------------------------------|---------------------------------|---------------------------|----------------------------------------------------------------------------------------------------------------------------|-------------------------------------------------------------------------------------------------------------------------------------|-----|
| Categorical Variable:           | Variant:                        | Sub-Variable:             | Definition:                                                                                                                | Code:                                                                                                                               |     |
| Policy Instrument <sup>12</sup> |                                 | <b>Nudging</b>            | Stimulation of the right conduct through change in choice architecture.                                                    | 112                                                                                                                                 |     |
|                                 |                                 | <b>Education/Training</b> | Stimulation of the right conduct through teaching students or training professionals.                                      | 113                                                                                                                                 |     |
|                                 |                                 | <b>Other</b>              | Listed values of sub-instruments under 'Information' are not appropriate. Suggestion for a new value.                      | 119                                                                                                                                 |     |
|                                 |                                 | <b>Unspecified</b>        | Policy statement emphasize prevention of the wrong conduct through communication but fails to explain through which means. | 210                                                                                                                                 |     |
|                                 |                                 | <b>Awareness</b>          | Emphasis on prevention of the wrong conduct through mass communication.                                                    | 211                                                                                                                                 |     |
|                                 | <b>Negative</b>                 | <b>Nudging</b>            | Emphasis on prevention of the wrong conduct change in choice architecture.                                                 | 212                                                                                                                                 |     |
|                                 |                                 | <b>Education/Training</b> | Emphasis on prevention of the wrong conduct through teaching students or training professionals.                           | 213                                                                                                                                 |     |
|                                 |                                 | <b>Other</b>              | Listed values of sub-instruments under 'Information' are not appropriate. Suggestion for a new value.                      | 219                                                                                                                                 |     |
|                                 | <b>Economic Means (Carrots)</b> | <b>Unspecified</b>        | <b>Unspecified</b>                                                                                                         | Policy states to use economic means but does not indicate whether it is to encourage through incentives or deter through penalties. | 020 |
|                                 |                                 | <b>Positive</b>           | <b>Unspecified</b>                                                                                                         | Policy states that there is an incentive but does not identify whether it is in cash or in kind.                                    | 120 |
| <b>Incentive (in cash)</b>      |                                 |                           | Money is offered as a way to encourage change but there is no obligation to take it.                                       | 121                                                                                                                                 |     |

**Supplementary Table 1H** List of values and their corresponding identification number code for ‘policy instrument’.

| Value                           |             |                            |                                                                                                                                                                                                                                                                                                                                                          |     |
|---------------------------------|-------------|----------------------------|----------------------------------------------------------------------------------------------------------------------------------------------------------------------------------------------------------------------------------------------------------------------------------------------------------------------------------------------------------|-----|
| Categorical Variable:           | Variant:    | Sub-Variable:              | Code:                                                                                                                                                                                                                                                                                                                                                    |     |
| Policy Instrument <sup>12</sup> |             | Sub-Instrument             | Definition:                                                                                                                                                                                                                                                                                                                                              |     |
|                                 |             | <b>Incentive (in kind)</b> | Goods, commodities or services are offered instead of money to encourage change but there is no obligation to take it. Examples include free health care, free medicine, free dental care or free meals. <sup>12</sup>                                                                                                                                   | 122 |
|                                 |             | <b>Other</b>               | Listed values of sub-instruments under ‘Economic Means’ are not appropriate. Suggestion for a new value.                                                                                                                                                                                                                                                 | 219 |
|                                 |             | <b>Unspecified</b>         | Policy states that consequences will be given to an action to dissuade addressees. However, it does not state if taxes or fees will be given.                                                                                                                                                                                                            | 220 |
|                                 |             | <b>Penalties</b>           | Material resources are taken as a consequence of an action to dissuade addressees. This may include taxes or fees. <sup>12</sup>                                                                                                                                                                                                                         | 221 |
|                                 |             | <b>Other</b>               | Listed values of sub-instruments under ‘Economic Means’ are not appropriate. Suggestion for a new value.                                                                                                                                                                                                                                                 | 219 |
| Regulations (Sticks)            | Unspecified | <b>Unspecified</b>         | Policy states that there is a regulation but does not indicate what kind. There is no indication of whether addresses are required to do (positive) or must not do (negative) something.                                                                                                                                                                 | 030 |
|                                 |             | <b>Self-Regulation</b>     | Internal control of systems, organization or activities rather than by external. There is no indication of whether addresses are required to do (positive) or must not do (negative) something.                                                                                                                                                          | 031 |
|                                 |             | <b>Co-Regulation</b>       | Interplay between multiple organizations. For example, a “legal framework combine both public and private policy instruments to strengthen their stand-alone capabilities towards a common policy objective.” <sup>15</sup> There is no indication of whether addresses are required to do (positive) or must not do (negative) something. <sup>16</sup> | 032 |

**Supplementary Table 1H** List of values and their corresponding identification number code for 'policy instrument'.

| Value                           |                 |                          |                                                                                                                                                                                                                                                                                                                                                             |
|---------------------------------|-----------------|--------------------------|-------------------------------------------------------------------------------------------------------------------------------------------------------------------------------------------------------------------------------------------------------------------------------------------------------------------------------------------------------------|
| Categorical Variable:           | Variant:        | Sub-Variable:            | Code:                                                                                                                                                                                                                                                                                                                                                       |
| Policy Instrument <sup>12</sup> |                 | Sub-Instrument           | Definition:                                                                                                                                                                                                                                                                                                                                                 |
|                                 |                 | <b>Public Regulation</b> | "Any national, provincial or local government legislation or subordinate legislation, or any license, tariff, directive or similar authorisation issued by a regulatory authority or pursuant to any statutory authority." <sup>17</sup> There is no indication of whether addresses are required to do (positive) or must not do (negative) something. 033 |
|                                 |                 | <b>Other</b>             | Listed values of sub-instruments under 'Regulations' are not appropriate. Suggestion for a new value. 039                                                                                                                                                                                                                                                   |
|                                 |                 | <b>Unspecified</b>       | Policy states that there is an obligation for addresses to do something or to do something right but does indicate whether it is through self-, co- or public regulation. 130                                                                                                                                                                               |
|                                 |                 | <b>Self-Regulation</b>   | Internal control that requires addresses to do something or to do something right. 131                                                                                                                                                                                                                                                                      |
|                                 | <b>Positive</b> | <b>Co-Regulation</b>     | Interplay between multiple organizations that requires addresses to do something or to do something right. 132                                                                                                                                                                                                                                              |
|                                 |                 | <b>Public Regulation</b> | Regulation coming from regulatory authority that requires addresses to do something or to do something right. 133                                                                                                                                                                                                                                           |
|                                 |                 | <b>Other</b>             | Listed values of sub-instruments under 'Regulations' are not appropriate. Suggestion for a new value. 139                                                                                                                                                                                                                                                   |
|                                 |                 | <b>Unspecified</b>       | Policy states that addresses must refrain from doing something but does indicate whether it is through self-, co- or public regulation. 230                                                                                                                                                                                                                 |
|                                 | <b>Negative</b> | <b>Self-Regulation</b>   | Internal control where addresses must refrain from doing something. 231                                                                                                                                                                                                                                                                                     |
|                                 |                 | <b>Co-Regulation</b>     | Interplay between multiple organizations where addresses must refrain from doing something. 232                                                                                                                                                                                                                                                             |

**Supplementary Table 1H** List of values and their corresponding identification number code for 'policy instrument'.

| Value                           |          |                          |                                                                                                       |       |
|---------------------------------|----------|--------------------------|-------------------------------------------------------------------------------------------------------|-------|
| Categorical Variable:           | Variant: | Sub-Variable:            | Definition:                                                                                           | Code: |
| Policy Instrument <sup>12</sup> |          | Sub-Instrument           |                                                                                                       |       |
|                                 |          | <b>Public Regulation</b> | Regulation coming from regulatory authority where addresses must refrain from doing something.        | 233   |
|                                 |          | <b>Other</b>             | Listed values of sub-instruments under 'Regulations' are not appropriate. Suggestion for a new value. | 239   |

**Supplementary Table 1H** List of values and their corresponding identification number code for ‘building blocks’.**Categorical Variable:** Building Block <sup>18</sup>

| <b>Value:</b>                 | <b>Definition:</b>                                                                                                                                                                                                                                                                                                                                                                                                     | <b>Code:</b> |
|-------------------------------|------------------------------------------------------------------------------------------------------------------------------------------------------------------------------------------------------------------------------------------------------------------------------------------------------------------------------------------------------------------------------------------------------------------------|--------------|
| <b>Unspecified</b>            | No defined building blocks                                                                                                                                                                                                                                                                                                                                                                                             | 00           |
| <b>Delivery</b>               | Access to healthcare, how medical procedures (such as surgeries) are performed or to new health technologies.                                                                                                                                                                                                                                                                                                          | 01           |
| <b>Financing</b>              | Resource, funding and means.                                                                                                                                                                                                                                                                                                                                                                                           | 02           |
| <b>Good Practice</b>          | An action to change the behaviour of the actors for example through means of guidelines or manuals.                                                                                                                                                                                                                                                                                                                    | 03           |
| <b>Governance</b>             | Refers broadly to the action or manner of governing. It encompasses all process for resources allocation, decision-making, coordination, reporting etc in an organization.<br>“ensuring strategic policy frameworks exist and are combined with effective oversight, coalition-building, the provision of appropriate regulations and incentives, attention to system-design, and accountability.” <sup>19</sup>       | 04           |
| <b>Health Technologies</b>    | The application of organized knowledge and skills in the form of medicines, medical devices, vaccines, procedures and systems developed to solve a health problem and improve quality of life. In the context of AMR this could include: new antibiotics, rapid diagnostics, devices that could prevent, diagnose or treat illnesses or diseases other than through pharmacological, immunological or metabolic means. | 05           |
| <b>Information Systems</b>    | Improving the collection of information through tools such as electronic health records.                                                                                                                                                                                                                                                                                                                               | 06           |
| <b>Infrastructure</b>         | Hardware (i.e. non-people). This could be building more laboratories, hospitals, support centres, pharmacies etc.                                                                                                                                                                                                                                                                                                      | 07           |
| <b>Training and Education</b> | For example, educational programmes at all levels and ages or holding seminars and workshops for further professional development.                                                                                                                                                                                                                                                                                     | 08           |
| <b>Other</b>                  | Listed values of building blocks are not appropriate. Suggestion for a new value.                                                                                                                                                                                                                                                                                                                                      | 99           |

## REFERENCES

1. Getahun H, Balkhy H. Global governance to tackle antimicrobial resistance: The way forward.
2. United Nations. International Standard Industrial Classification of All Economic Activities (ISIC): UN 2008.
3. Rushton J. The economics of animal health and production: Cabi 2009:164 -165.
4. Singer AC, Shaw H, Rhodes V, et al. Review of antimicrobial resistance in the environment and its relevance to environmental regulators. *Frontiers in microbiology* 2016;7:1728.
5. George A. Antimicrobial resistance, trade, food safety and security. *One Health* 2018;5:6.
6. Jans C, Sarno E, Collineau L, et al. Consumer exposure to antimicrobial resistant bacteria from food at Swiss retail level. *Frontiers in microbiology* 2018;9:362.
7. WHO. WHO traditional medicine strategy: 2014-2023: World Health Organization 2013.
8. Dar OA, Hasan R, Schlundt J, et al. Exploring the evidence base for national and regional policy interventions to combat resistance. *The Lancet* 2016;387(10015):285-95.
9. Antibiotic resistance—linking human and animal health. Improving food safety through a one health approach: workshop summary; 2012. National Academies Press.
10. Chereau F, Opatowski L, Tourdjman M, et al. Risk assessment for antibiotic resistance in South East Asia. *Bmj* 2017;358:j3393.
11. Sabatier PA, Weible CM. Theories of the policy process: Westview Press 2014.
12. Bemelmans-Vidéc M-L, Rist RC, Vedung EO. Carrots, sticks, and sermons: Policy instruments and their evaluation: Transaction Publishers 2011.
13. Weiss JA, Tschirhart M. Public information campaigns as policy instruments. *Journal of policy analysis and management* 1994;13(1):82-119.
14. Thaler RH, Sunstein CR. Nudge: Improving decisions about health, wealth, and happiness: Penguin 2009.
15. Rose S, Spinks N, Canhoto AI. Management research: Applying the principles: Routledge 2014.
16. Ugarte S, Swinkles V. Definition and Benefits of Co-Regulation. Policy Instruments and Co-Regulation for the Sustainability of Value Chains: ASME Press 2015:0.
17. Stein C. New Companies Act Unlocked: Siber Ink 2011.
18. WHO. Monitoring the building blocks of health systems: a handbook of indicators and their measurement strategies: World Health Organization 2010.
19. Yuan B, Jian W, He L, et al. The role of health system governance in strengthening the rural health insurance system in China. *International journal for equity in health* 2017;16(1):44.
